# Supplementary material for: NF-κB/p52 augments ETS1 binding genome-wide to promote glioma progression
Source: PubMed Central journal article supplement (PMC10122670; doi:10.1038/s42003-023-04821-2), 2023-04-22
Supplement: 42003_2023_4821_MOESM2_ESM.pdf [file 42003_2023_4821_MOESM2_ESM.pdf]

## Description of Additional Supplementary Files

**File Name:** Supplementary Data

**Description:** The source data behind Figures 1c, 2a, 2d, 3, 5b-c
